# Supplementary material
Source: publisher figshare collection journal article supplement (https://geolsoc.figshare.com/ndownloader/files/28709758)
Supplement: Supplementary file 1 [file 28709758]

**Fumaroles Donna Rachele Sector - Tmax (°C) -**

| <b>Thermal camera</b> |             |             |
|-----------------------|-------------|-------------|
| <b>Thermal camera</b> | <b>DR04</b> | <b>DR05</b> |
| January 2008          | 98.0        | 97.0        |
| February 2008         |             |             |
| March 2008            | 97.0        | 96.0        |
| April 2008            | 97.0        | 98.0        |
| May 2008              | 96.1        | 99.8        |
| June 2008             | 101.0       | 99.4        |
| July 2008             | 101.1       | 99.5        |
| August 2008           | 101.5       | 95.8        |
| September 2008        | 96.6        | 99.5        |
| October 2008          | 100.1       | 99.0        |
| November 2008         | 99.3        | 99.7        |
| December 2008         |             |             |
| January 2009          | 100.3       | 98.9        |
| February 2009         | 99.4        | 99.4        |
| March 2009            | 100.2       | 99.8        |
| April 2009            | 98.0        | 100.0       |
| May 2009              | 100.0       | 100.4       |
| June 2009             | 88.6        | 99.6        |
| July 2009             | 100.4       | 99.8        |
| August 2009           | 100.8       | 100.0       |
| September 2009        | 94.8        | 99.4        |
| October 2009          | 99.3        | 99.3        |
| November 2009         | 100.1       | 99.7        |
| December 2009         |             |             |
| January 2010          | 98.5        | 96.1        |
| February 2010         |             |             |
| March 2010            | 99.5        | 99.1        |
| April 2010            | 99.6        | 99.3        |
| May 2010              | 98.3        | 98.6        |
| June 2010             | 98.7        | 99.3        |
| July 2010             | 98.8        | 98.4        |
| August 2010           |             |             |
| September 2010        | 98.9        | 98.0        |
| October 2010          |             |             |
| November 2010         |             |             |
| December 2010         | 94.0        | 98.4        |
| January 2011          | 98.4        | 98.6        |
| February 2011         | 99.0        | 98.1        |
| March 2011            | 97.0        | 98.7        |
| April 2011            | 99.3        | 99.0        |
| May 2011              | 99.6        | 99.1        |
| June 2011             | 99.9        | 98.7        |
| July 2011             |             |             |
| August 2011           |             |             |
| September 2011        |             |             |
| October 2011          |             |             |
| November 2011         |             |             |
| December 2011         |             |             |
| January 2012          |             |             |
| February 2012         |             |             |
| March 2012            |             |             |
| April 2012            |             |             |
| May 2012              |             |             |
| June 2012             |             |             |
| July 2012             |             |             |
| August 2012           |             |             |
| September 2012        |             |             |
| October 2012          |             |             |
| November 2012         |             |             |
| December 2012         |             |             |
| January 2013          |             |             |
| February 2013         |             |             |
| March 2013            |             |             |
| April 2013            |             |             |
| May 2013              |             |             |
| June 2013             |             |             |
| July 2013             |             |             |
| August 2013           |             |             |
| September 2013        |             |             |
| October 2013          |             |             |
| November 2013         |             |             |
| December 2013         |             |             |
| January 2014          |             |             |
| February 2014         |             |             |
| March 2014            |             |             |
| April 2014            |             |             |
| May 2014              |             |             |
| June 2014             |             |             |
| July 2014             |             |             |
| August 2014           |             |             |
| September 2014        |             |             |
| October 2014          |             |             |
| November 2014         |             |             |
| December 2014         |             |             |
| January 2015          |             |             |
| February 2015         |             |             |
| March 2015            |             |             |
| April 2015            |             |             |
| May 2015              |             |             |
| June 2015             |             |             |
| July 2015             |             |             |
| August 2015           |             |             |
| September 2015        |             |             |
| October 2015          |             |             |
| November 2015         |             |             |
| December 2015         |             |             |
| January 2016          |             |             |
| February 2016         | 101.6       | 97.8        |
| March 2016            | 99.0        | 92.5        |
| April 2016            | 98.7        | 94.4        |
| May 2016              | 97.9        | 89.2        |
| June 2016             | 97.8        | 96.3        |
| July 2016             | 99.0        | 97.8        |
| August 2016           | 99.0        | 99.3        |
| September 2016        | 99.0        | 96.7        |
| October 2016          | 99.0        | 86.0        |
| November 2016         | 98.9        | 96.8        |
| December 2016         | 101.0       | 88.3        |
| January 2017          |             |             |
| February 2017         |             |             |
| March 2017            |             |             |
| April 2017            |             |             |
| May 2017              |             |             |
| June 2017             | 97.9        | 98.4        |
| July 2017             | 99.1        | 97.9        |
| August 2017           |             |             |
| September 2017        | 99.6        | 81.0        |
| October 2017          | 99.7        | 94.5        |
| November 2017         | 99.7        | 95.3        |
| December 2017         |             |             |

Long-period monitoring (2008/2017) of fumaroles located in Donna Rachele fumarolic field (Maximum Temperature acquired with the use of thermal camera).

Location: 40.722128° Lat - 13.879470° Long

**Fumaroles Low Pizzone Sector - Tmax (°C) -**

| <b>Thermal camera</b> |                |                |
|-----------------------|----------------|----------------|
| <b>Thermal camera</b> | <b>PZN_L01</b> | <b>PZN_L03</b> |
| January 2009          | 96.1           | 35.8           |
| February 2009         | 92.0           | 24.9           |
| March 2009            | 92.1           | 13.4           |
| April 2009            | 98.5           | 34.2           |
| May 2009              | 96.3           | 25.7           |
| June 2009             | 98.1           | 87.4           |
| July 2009             | 99.2           | 47.2           |
| August 2009           | 99.5           | 86.1           |
| September 2009        | 95.9           | 37.3           |
| October 2009          | 97.1           | 27.8           |
| November 2009         | 95.9           | 23.3           |
| December 2009         | 96.4           | 22.4           |
| January 2010          | 80.9           | 16.1           |
| February 2010         |                |                |
| March 2010            | 81.3           | 22.7           |
| April 2010            | 96.3           | 30.4           |
| May 2010              | 95.5           | 31.3           |
| June 2010             | 97.1           | 28.8           |
| July 2010             | 97.4           | 54.7           |
| August 2010           |                |                |
| September 2010        | 97.2           | 29.6           |
| October 2010          | 94.3           | 20.4           |
| November 2010         |                |                |
| December 2010         | 96.8           | 37.8           |
| January 2011          | 97.5           | 21.7           |
| February 2011         | 98.2           | 93.1           |
| March 2011            |                |                |
| April 2011            | 98.9           | 87.8           |
| May 2011              | 98.5           | 47.1           |
| June 2011             | 97.3           | 38.2           |
| July 2011             |                |                |
| August 2011           | 97.7           |                |
| September 2011        |                |                |
| October 2011          |                |                |
| November 2011         | 95.6           | 22.1           |
| December 2011         |                |                |
| January 2012          |                |                |
| February 2012         |                |                |
| March 2012            |                |                |
| April 2012            |                |                |
| May 2012              |                |                |
| June 2012             |                |                |
| July 2012             |                |                |
| August 2012           |                |                |
| September 2012        |                |                |
| October 2012          |                |                |
| November 2012         |                |                |
| December 2012         |                |                |
| January 2013          |                |                |
| February 2013         |                |                |
| March 2013            |                |                |
| April 2013            |                |                |
| May 2013              |                |                |
| June 2013             |                |                |
| July 2013             |                |                |
| August 2013           |                |                |
| September 2013        |                |                |
| October 2013          |                |                |
| November 2013         |                |                |
| December 2013         |                |                |
| January 2014          |                |                |
| February 2014         |                |                |
| March 2014            |                |                |
| April 2014            |                |                |
| May 2014              |                |                |
| June 2014             |                |                |
| July 2014             |                |                |
| August 2014           |                |                |
| September 2014        |                |                |
| October 2014          |                |                |
| November 2014         |                |                |
| December 2014         |                |                |
| January 2015          |                |                |
| February 2015         |                |                |
| March 2015            |                |                |
| April 2015            |                |                |
| May 2015              |                |                |
| June 2015             |                |                |
| July 2015             |                |                |
| August 2015           |                |                |
| September 2015        |                |                |
| October 2015          |                |                |
| November 2015         |                |                |
| December 2015         |                |                |
| January 2016          | 89.6           | 35.2           |
| February 2016         | 96.1           | 26.6           |
| March 2016            | 96.3           | 24.2           |
| April 2016            | 96.7           | 30.8           |
| May 2016              | 98.0           | 29.3           |
| June 2016             | 97.6           | 41.9           |
| July 2016             | 98.2           | 89.0           |
| August 2016           | 98.1           | 53.5           |
| September 2016        | 95.6           | 27.6           |
| October 2016          | 94.9           | 30.1           |
| November 2016         | 92.4           | 98.7           |
| December 2016         | 95.4           | 23.4           |
| January 2017          |                |                |
| February 2017         |                |                |
| March 2017            |                |                |
| April 2017            |                |                |
| May 2017              |                |                |
| June 2017             | 99.8           | 94.5           |
| July 2017             | 99.7           | 46.8           |
| August 2017           |                |                |
| September 2017        | 95.2           | 35.7           |
| October 2017          | 95.5           | 88.1           |
| November 2017         | 89.9           | 36.2           |
| December 2017         |                |                |
| January 2018          | 75.2           | 15.7           |
| February 2018         |                |                |
| March 2018            | 91.6           | 27.7           |
| April 2018            | 90.8           | 31.2           |
| May 2018              | 95.9           | 27.2           |
| June 2018             | 97.1           | 92.6           |
| July 2018             | 101.7          | 39.3           |
| August 2018           |                |                |
| September 2018        | 102.8          | 52.8           |
| October 2018          | 96.5           | 35.2           |
| November 2018         |                |                |
| December 2018         | 96.4           | 27.8           |
| January 2019          | 94.3           | 92.8           |
| February 2019         | 89.9           | 22.4           |
| March 2019            | 95.7           | 26.3           |
| April 2019            | 93.4           |                |
| May 2019              | 94.5           | 91.6           |
| June 2019             | 97.0           | 58.9           |
| July 2019             | 96.1           | 48.4           |
| August 2019           | 97.0           | 48.5           |
| September 2019        | 95.2           | 70.7           |
| October 2019          | 92.6           | 31.5           |
| November 2019         | 90.1           | 34.8           |
| December 2019         |                |                |
| January 2020          | 87.3           | 23.3           |

Long-period monitoring (2008/2018) of fumaroles located in Low Pizzone area (Maximum Temperature acquired with the use of thermal camera).

Location: 40.736790° Lat - 13.885419° Long
